# Supplementary material
Source: MDPI journal article supplement (https://www.mdpi.com/2073-4433/13/3/383)
Supplement: s1 [file s1]

# Supplementary Materials: Air Pollutants and CO<sub>2</sub> Emissions in Industrial Parks and Evaluation of Their Green Upgrade on Regional Air Quality Improvement: A Case Study of Seven Cities in Henan Province

Wanting Hei <sup>1,2</sup>, Xiao Li <sup>2,3</sup>, Gengyu Gao <sup>1,2</sup>, Shanshan Wang <sup>2,3</sup>, Ruiqin Zhang <sup>2,3</sup>, Ke Wang <sup>2,3,\*</sup>

**Table S1.** The information of leading industry in 13 industrial parks.

| Type of IP          | Name of industrial parks | Leading industry                                                                 |
|---------------------|--------------------------|----------------------------------------------------------------------------------|
| Energy-intensive IP | Puyang Park              | Chemical and equipment manufacturing                                             |
|                     | Hongqiqu Park            | Equipment manufacturing, auto parts processing industry                          |
|                     | Xinxiang ET Park         | Chemical fiber textile, automobile and auto parts industry                       |
|                     | Jiaozuo Park             | Equipment manufacturing, new materials industry                                  |
|                     | Huanglong Park           | Agricultural products processing, logistics                                      |
|                     | Anyang Steel Park        | Iron and steel production                                                        |
| Emerging IP         | Kaifeng ET Park          | auto parts and agricultural by-product                                           |
|                     | Hebi Park                | Quality improvement of metallic magnesium industry and Plastic products industry |
| Mixed IP            | Zhengzhou ET Park        | Automobile and equipment manufacturing industry, modern logistics industry       |
|                     | Zhengzhou HA Park        | Electronic information, new energy industry                                      |
|                     | Anyang HA Park           | Equipment manufacturing, electronic information industry                         |
|                     | Xinxiang HA Park         | Electronic appliances and new biological medicine industry                       |
|                     | Zhengzhou AP Park        | Electronic information industry, logistics industry                              |

**Table S2.** Emission factors of power plant and industry boiler [51].

| Sector          | Fuel type |                       | SO <sub>2</sub>   | NO <sub>x</sub>   | CO               | PM <sub>10</sub>     | PM <sub>2.5</sub>   | VOCs              | NH <sub>3</sub>   |
|-----------------|-----------|-----------------------|-------------------|-------------------|------------------|----------------------|---------------------|-------------------|-------------------|
| Power plant     | Raw coal  | Pulverized coal stove | CS                | A                 | 2 <sup>h</sup>   | 46 <sup>h</sup>      | 12 <sup>h</sup>     | 0.15 <sup>h</sup> | 0.02 <sup>g</sup> |
|                 |           | fluidized-bed furnace | CS                | 1.5 <sup>c</sup>  | 2.1 <sup>c</sup> | 1.54B <sup>c</sup>   | 0.45B <sup>c</sup>  | 0.15 <sup>h</sup> | 0.02 <sup>g</sup> |
|                 |           | Garbage/bio mass      | 2.67 <sup>a</sup> | 1.54 <sup>a</sup> | 3.6 <sup>e</sup> | 10.28 <sup>a,e</sup> | 5.88 <sup>a,e</sup> | 5.3 <sup>f</sup>  | 0.04 <sup>b</sup> |
| Industry Boiler | Raw coal  | Natural gas           | CS                | 9.82 <sup>a</sup> | 1.3 <sup>h</sup> | 0.24 <sup>h</sup>    | 0.17 <sup>h</sup>   | 0.12 <sup>c</sup> | 0.05 <sup>g</sup> |
|                 |           | layer burning stove   | CS                | 4 <sup>h</sup>    | 15 <sup>h</sup>  | 5.4 <sup>h</sup>     | 1.89 <sup>h</sup>   | 0.18 <sup>h</sup> | 0.02 <sup>g</sup> |
|                 |           | Pulverized coal stove | CS                | 4.72 <sup>a</sup> | 2 <sup>c</sup>   | 3.51B <sup>a</sup>   | 0.22B <sup>a</sup>  | 0.18 <sup>h</sup> | 0.02 <sup>g</sup> |
|                 | Fuel type | fluidized-bed furnace | CS                | 7.5 <sup>h</sup>  | 2 <sup>h</sup>   | 28.08 <sup>h</sup>   | 5.04 <sup>h</sup>   | 0.18 <sup>h</sup> | 0.02 <sup>g</sup> |
|                 |           | coke                  | CS                | 4.8 <sup>c</sup>  | 6.6 <sup>c</sup> | 0.29 <sup>c</sup>    | 0.15 <sup>c</sup>   | 0.04 <sup>c</sup> | 0.02 <sup>g</sup> |
|                 |           | Natural gas           | CS                | 2.09 <sup>d</sup> | 1.3 <sup>h</sup> | 0.24 <sup>h</sup>    | 0.17 <sup>h</sup>   | 0.18 <sup>h</sup> | 0.05 <sup>g</sup> |
|                 |           | Diesel                | 20S               | 9.62 <sup>h</sup> | 0.6 <sup>h</sup> | 0.5 <sup>h</sup>     | 0.5 <sup>h</sup>    | 0.15 <sup>h</sup> | 0.13 <sup>g</sup> |

Note: The gas unit is g/m<sup>3</sup>, and the remaining units are kg/t. The value of C depends on the installed capacity and fuel combustion method. When the installed capacity is less than 100 MW without low nitrogen combustion (LNB) technology, A=10.5; when 100 MW ≤ installed capacity ≤ 300 MW and no

LNB A=8.85, if there has LNB A=5.85; when the value of installed capacity is >300MW and there is LNB, A=5.55. The value of B is the average value of coal based ash.

<sup>a</sup> MEE [52]; <sup>b</sup> Pham et al. [53]; <sup>c</sup> He et al. [54]; <sup>d</sup> Huang et al. [55]; <sup>e</sup> U.S.EPA [56]; <sup>f</sup> MEE [57]; <sup>g</sup> Yin et al. [58]; <sup>h</sup> Zheng et al.

**Table S3.** Industry process emission factor (g/kg-product or raw material) [51].

| Industry Process                       | Classification          | SO <sub>2</sub>   | NO <sub>x</sub>   | CO                | PM <sub>10</sub>   | PM <sub>2.5</sub> | VOCs               | NH <sub>3</sub>  |
|----------------------------------------|-------------------------|-------------------|-------------------|-------------------|--------------------|-------------------|--------------------|------------------|
| Non-metallic mineral products industry | Cement (pulverized)     |                   |                   |                   | 8 <sup>p</sup>     | 2 <sup>p</sup>    |                    |                  |
|                                        | Cement (new dry method) | 4.8 <sup>c</sup>  | 13.1 <sup>c</sup> | 40.2 <sup>p</sup> | 8.05 <sup>e</sup>  | 3.40 <sup>e</sup> | 0.18 <sup>d</sup>  |                  |
|                                        | Crick and tile          | 0.6 <sup>p</sup>  | 0.05 <sup>p</sup> | 4.04 <sup>p</sup> | 0.13 <sup>p</sup>  | 0.04 <sup>a</sup> | 0.13 <sup>a</sup>  |                  |
|                                        | Refractory              |                   |                   |                   | 2.27 <sup>b</sup>  | 1.63 <sup>b</sup> |                    |                  |
|                                        | Ceramic                 | 2.25 <sup>p</sup> | 5 <sup>p</sup>    |                   | 2.42 <sup>p</sup>  | 0.67 <sup>p</sup> | 29.22 <sup>p</sup> |                  |
| Non-ferrous metal                      | Glass                   |                   |                   |                   | 3.07 <sup>f</sup>  | 2.94 <sup>f</sup> |                    |                  |
|                                        | Electrolytic aluminum   |                   |                   |                   | 6.97 <sup>f</sup>  | 5.2 <sup>f</sup>  |                    |                  |
|                                        | The combination method  |                   |                   |                   | 56.4 <sup>f</sup>  | 42.3 <sup>f</sup> |                    |                  |
| Chemical industry                      | Bayer method            |                   |                   |                   | 12.4 <sup>f</sup>  | 9.18 <sup>f</sup> |                    |                  |
|                                        | Fertilizers             |                   |                   |                   | 2.12 <sup>f</sup>  | 1.86 <sup>f</sup> |                    | 2 <sup>n</sup>   |
|                                        | Printing and dyeing     |                   |                   |                   |                    |                   | 81.4 <sup>f</sup>  |                  |
|                                        | Synthetic rubber        |                   |                   |                   |                    |                   | 7.17 <sup>f</sup>  |                  |
|                                        | Polypropylene           |                   |                   |                   |                    |                   | 3 <sup>p</sup>     |                  |
| Black metal                            | Viscose fiber           |                   |                   |                   |                    |                   | 14.5 <sup>f</sup>  |                  |
|                                        | Paint                   |                   |                   |                   |                    |                   | 15 <sup>f</sup>    |                  |
|                                        | synthesis ammonia       | 3 <sup>g</sup>    | 0.9 <sup>g</sup>  | 142 <sup>n</sup>  |                    |                   | 4.72 <sup>f</sup>  | 2.1 <sup>m</sup> |
| Paper industry                         | Electric steelmaking    |                   |                   |                   | 8.12 <sup>f</sup>  | 6.02 <sup>f</sup> |                    |                  |
|                                        | Converter steelmaking   |                   |                   |                   | 14.68 <sup>f</sup> | 10.5 <sup>f</sup> |                    |                  |
|                                        | Hot rolled steel        |                   |                   |                   |                    |                   | 0.3 <sup>f</sup>   |                  |
| Ink printing                           |                         |                   |                   |                   |                    |                   | 2.6 <sup>f</sup>   |                  |
| Textile                                |                         |                   |                   |                   |                    |                   | 750 <sup>f</sup>   |                  |
|                                        |                         |                   |                   |                   |                    |                   | 81.4 <sup>f</sup>  |                  |

<sup>a</sup> U.S.EPA. [56]; <sup>b</sup> Zhou et al. [59]; <sup>c</sup> Lei et al. [60]; <sup>d</sup> Bo et al. [61]; <sup>e</sup> Lei et al. [62]; <sup>f</sup> MEE [57]; <sup>g</sup> Zhao et al. [63]; <sup>m</sup> Yin. [58]; <sup>n</sup> Zhao et al. [64]; <sup>p</sup> MEE. [65].

**Table S4.** Related parameters of PM<sub>x</sub> emission factors for coal-fired boilers [65].

| Sector          | Boiler Type                       | ar   | f <sub>2.5</sub> | f <sub>10</sub> |
|-----------------|-----------------------------------|------|------------------|-----------------|
| Power Plant     | Pulverized Coal Stove             | 0.25 | 0.06             | 0.23            |
|                 | Circulating fluidized bed boiler  | 0.44 | 0.07             | 0.29            |
| Industry Boiler | Stratum Burning Furnace           | 0.85 | 0.07             | 0.20            |
|                 | Circulating fluidized bed furnace | 0.40 | 0.07             | 0.20            |

**Table S5.** CO<sub>2</sub> emission factors and related parameters.

| Energy type             | NCV                   | CC                 | O                 | Emission Factor |
|-------------------------|-----------------------|--------------------|-------------------|-----------------|
| Raw coal                | 20908 <sup>a</sup>    | 26.37 <sup>b</sup> | 0.94 <sup>b</sup> | 1.90            |
| General bituminous coal | 26620 <sup>a</sup>    | 26.1 <sup>b</sup>  | 0.93 <sup>b</sup> | 1.97            |
| Natural gas             | 35584 <sup>a</sup>    | 15.3 <sup>b</sup>  | 0.99 <sup>b</sup> | 19.76           |
| Liquefied natural gas   | 51434.72 <sup>a</sup> | 17.2 <sup>b</sup>  | 0.98 <sup>b</sup> | 3.10            |
| Liquefied petroleum gas | 50719 <sup>a</sup>    | 17.2 <sup>b</sup>  | 0.98 <sup>b</sup> | 3.10            |
| Gasoline                | 43070 <sup>a</sup>    | 18.9 <sup>b</sup>  | 0.98 <sup>b</sup> | 2.93            |
| Diesel oil              | 42652 <sup>a</sup>    | 20.2 <sup>b</sup>  | 0.98 <sup>b</sup> | 3.10            |
| Fuel oil                | 41816 <sup>a</sup>    | 21.1 <sup>b</sup>  | 0.98 <sup>b</sup> | 3.17            |

Note: NCV, kJ/kg or kJ/m<sup>3</sup>; CC, tones C/TJ; CO<sub>2</sub> emission factor, tCO<sub>2</sub>/t or t CO<sub>2</sub>/10<sup>4</sup> m<sup>3</sup>.

a. NBS; b. NDRC [66].

**Table S6.** Energy saving of 11 energy efficiency technologies in coal-fired power plants [67].

| Number | Technical name                                                                            | Energy saving (gce/kWh) |
|--------|-------------------------------------------------------------------------------------------|-------------------------|
| 1      | Gasification micro-oil ignition technology                                                | 0.7                     |
| 2      | Plasma pulverized coal ignition technology                                                | 0.2                     |
| 3      | High temperature air ignition technology                                                  | 1.4                     |
| 4      | Oxygen-enriched double-strength ignition stabilization and fuel-saving technology         | 1.5                     |
| 5      | Leading engine steam heating start technology                                             | 0.3                     |
| 6      | Weak blast wave soot blowing technology                                                   | 1.4                     |
| 7      | Energy-saving technology of electric bag composite dust collector                         | 0.9                     |
| 8      | Electric precipitator energy saving submission control technology                         | 0.7                     |
| 9      | Boiler Intelligent Blowing Optimization and Online Coking Early Warning System Technology | 1.1                     |
| 10     | Flue gas system optimization and waste heat recovery technology                           | 1.1                     |
| 11     | Online information monitoring technology                                                  | 0.8                     |

**Table S7.** The removal efficiency under different end treatment and CCS technologies.

| Sector           | Second Sector      | Pollutants        | Technology | Removal efficiency (%) |
|------------------|--------------------|-------------------|------------|------------------------|
| Power Plant      | Raw Coal           | SO <sub>2</sub>   | Wet FGD    | 95.0 <sup>a</sup>      |
|                  |                    | NO <sub>x</sub>   | SCR        | 90.0 <sup>b</sup>      |
|                  |                    | CO                | CFB        | 1.3 <sup>a</sup>       |
|                  |                    | PM <sub>10</sub>  | FBH        | 99.6 <sup>a</sup>      |
|                  |                    | PM <sub>2.5</sub> | FBH        | 99.4 <sup>a</sup>      |
|                  |                    | CO <sub>2</sub>   | CCUS       | 34.0 <sup>d</sup>      |
| Industry boiler  | Raw Coal           | SO <sub>2</sub>   | Wet FGD    | 99.0 <sup>c</sup>      |
|                  |                    | NO <sub>x</sub>   | SCR        | 90.0 <sup>c</sup>      |
|                  |                    | PM <sub>10</sub>  | FBH        | 99.6 <sup>a</sup>      |
|                  |                    | PM <sub>2.5</sub> | FBH        | 99.4 <sup>a</sup>      |
|                  |                    | CO <sub>2</sub>   | CCUS       | 34.0 <sup>d</sup>      |
| Industry process | Chemical industry  | PM <sub>10</sub>  | FBH        | 99.6 <sup>a</sup>      |
|                  |                    | PM <sub>2.5</sub> | FBH        | 99.4 <sup>a</sup>      |
|                  |                    | VOCs              | UV         | 48.2 <sup>e</sup>      |
|                  | Rubber and Textile | VOCs              | RTO        | 99.9 <sup>e</sup>      |
|                  |                    | PM <sub>10</sub>  | FBH        | 99.6 <sup>a</sup>      |
|                  | Cement             | PM <sub>2.5</sub> | FBH        | 99.4 <sup>a</sup>      |
|                  |                    | PM <sub>10</sub>  | FBH        | 99.6 <sup>a</sup>      |
|                  | Others             | PM <sub>2.5</sub> | FBH        | 99.4 <sup>a</sup>      |
|                  |                    | SO <sub>2</sub>   | Wet FGD    | 99.0 <sup>c</sup>      |
|                  |                    | CO <sub>2</sub>   | CCUS       | 34.0 <sup>d</sup>      |

Note: FGD: flue gas desulfurization, SCR: selective catalytic reduction, CFB: selective catalytic reduction, FBH: Fabric baghouses, CCUS: Carbon Capture and Utilization and Storage. UV: activated carbon and photocatalytic degradation, RTO: regenerative thermal oxidation.

<sup>a</sup> Xu et al. [68]; <sup>b</sup> MEC; <sup>c</sup> MEC [69]; <sup>d</sup> CAEP [70]; <sup>e</sup> Zhang et al. [71].

**Table S8.** Specific parameter setting of WRF simulation.

| Parameter                     | Set standards                                     |
|-------------------------------|---------------------------------------------------|
| Model version                 | WRF4.0                                            |
| Vertical layering             | 43 floors                                         |
| Horizontal resolution         | 4km, 12km, 36km                                   |
| Microphysical solution        | Thompson graupel scheme                           |
| Longwave radiation scheme     | RRTM scheme                                       |
| Shortwave radiation program   | Goddard shortwave scheme Goddard shortwave scheme |
| Near-surface plan             | Monin-Obukhov scheme                              |
| Land Surface Process Plan     | unified Noah land-surface model                   |
| Boundary layer scheme         | YSU scheme                                        |
| Cumulus convection scheme     | Grell-Devenyi ensemble scheme                     |
| Four-dimensional assimilation | Assimilation of the first layer of mesh           |

**Table S9.** Specific parameter setting of CMAQ simulation.

| Parameter                             | Set standards      |
|---------------------------------------|--------------------|
| Model version                         | CMAQv5.0.2         |
| Grid nesting                          | Three layers       |
| Horizontal resolution                 | 4km, 12km, 36km    |
| Vertical layering                     | Fourteen floors    |
| Gas phase chemical reaction mechanism | SAPRC99            |
| Aerosol reaction mechanism            | Aero6              |
| Photochemical reaction rate           | in-line            |
| Sand dust                             | in-line            |
| Initial conditions                    | Daily accumulation |
| Boundary conditions                   | Default            |

**Table S10.** Emission inventory of air pollutants (t).

|                   |                                        | SO <sub>2</sub> | NO <sub>x</sub> | CO      | PM <sub>10</sub> | PM <sub>2.5</sub> | VOCs   | NH <sub>3</sub> |
|-------------------|----------------------------------------|-----------------|-----------------|---------|------------------|-------------------|--------|-----------------|
| Puyang Park       |                                        |                 |                 |         |                  |                   |        |                 |
| Sector            | The secondary sector                   |                 |                 |         |                  |                   |        |                 |
| Power plant       |                                        | 5395.40         | 3730.40         | 2408.70 | 554.00           | 144.50            | 180.60 | 24.09           |
| Industry          | Stratum                                |                 |                 |         |                  |                   |        |                 |
| Boiler            | Burning Furnace                        | 7.42            | 2.59            | 27.75   | 0.06             | 0.03              | 0.33   | 0.04            |
|                   | Circulating Fluidized bed furnace      | 2970.56         | 3887.19         | 1480.84 | 563.15           | 112.57            | 133.28 | 14.81           |
|                   | Natural gas                            | 0.00            | 41.30           | 25.69   | 4.74             | 3.36              | 3.56   | 0.99            |
|                   | Non-metallic mineral products industry | 72.30           | 6.00            | 487.00  | 633.43           | 409.54            | 16.99  | 0.00            |
| Process           | Chemical industry                      | 0.00            | 0.00            | 0.00    | 38.97            | 96.66             | 144.01 | 956.00          |
| Total             |                                        | 8445.68         | 7667.49         | 4429.98 | 1794.35          | 766.66            | 478.77 | 995.92          |
| Zhengzhou ET Park |                                        |                 |                 |         |                  |                   |        |                 |

|                 |                                        |         |         |          |         |        |         |       |
|-----------------|----------------------------------------|---------|---------|----------|---------|--------|---------|-------|
| Sector          | The secondary sector                   |         |         |          |         |        |         |       |
| Power plant     |                                        | 0.00    | 0.00    | 0.00     | 0.00    | 0.00   | 0.00    | 0.00  |
| Industry Boiler | Circulating Fluidized bed furna        | 24.42   | 45.65   | 12.17    | 51.27   | 9.20   | 1.10    | 0.12  |
|                 | Natural gas                            | 0.00    | 87.71   | 54.56    | 10.07   | 7.13   | 7.55    | 2.10  |
| Process         | Non-metallic mineral products industry | 283.40  | 23.62   | 1908.25  | 1386.96 | 456.45 | 233.40  | 0.00  |
| Total           |                                        | 307.82  | 156.97  | 1974.98  | 1448.31 | 472.79 | 242.05  | 2.22  |
| Kaifeng ET Park |                                        |         |         |          |         |        |         |       |
| Sector          | The secondary sector                   |         |         |          |         |        |         |       |
| Power plant     |                                        | 0.00    | 0.00    | 0.00     | 0.00    | 0.00   | 0.00    | 0.00  |
|                 | Stratum Burning Furnace                | 4.26    | 3.32    | 15.95    | 2.87    | 0.41   | 0.19    | 0.02  |
| Industry Boiler | Circulating Fluidized bed furna        | 259.70  | 339.97  | 129.55   | 11.47   | 3.27   | 11.66   | 1.30  |
|                 | Coke oven gas/blast furnace gas        | 0.00    | 28.74   | 17.84    | 3.29    | 2.33   | 2.47    | 0.69  |
|                 | Stratum Burning Furnace                | 0.04    | 0.17    | 0.38     | 0.07    | 0.06   | 0.01    | 0.01  |
| Process         | Chemical industry                      | 0.00    | 0.00    | 0.00     | 9.03    | 7.92   | 1463.93 | 8.52  |
|                 | Non-metallic mineral products industry | 833.29  | 87.15   | 5555.08  | 493.36  | 135.78 | 286.28  | 0.00  |
| Total           |                                        | 1097.30 | 459.40  | 5718.80  | 520.10  | 149.80 | 1764.50 | 10.50 |
| Hongqiqu Park   |                                        |         |         |          |         |        |         |       |
| Sector          | The secondary sector                   |         |         |          |         |        |         |       |
| Power plant     |                                        | 4392.28 | 5091.31 | 2481.96  | 371.25  | 169.61 | 191.21  | 33.14 |
| Industry Boiler | Natural gas                            | 0.00    | 1.21    | 0.75     | 0.14    | 0.10   | 0.10    | 0.03  |
| Process         | Chemical industry                      | 0.00    | 0.00    | 0.00     | 1.19    | 1.04   | 5.02    | 1.12  |
|                 | Non-metallic mineral products industry | 2010.00 | 167.50  | 13534.00 | 32.30   | 12.83  | 424.80  | 0.00  |
| Black metal     |                                        | 0.00    | 0.00    | 0.00     | 156.85  | 184.04 | 39.82   | 0.00  |
|                 | Non-ferrous metals                     | 0.00    | 0.00    | 0.00     | 21.14   | 23.72  | 0.00    | 0.00  |
| Total           |                                        | 6402.28 | 5260.02 | 16016.72 | 582.87  | 391.34 | 660.96  | 34.29 |
| Hebi Park       |                                        |         |         |          |         |        |         |       |
| Sector          | The secondary sector                   |         |         |          |         |        |         |       |

|                   |                                        |         |         |         |         |        |         |       |
|-------------------|----------------------------------------|---------|---------|---------|---------|--------|---------|-------|
| Power plant       |                                        | 3205.03 | 2474.47 | 1597.70 | 1102.43 | 671.04 | 119.83  | 15.98 |
| Industry Boiler   |                                        | 0.00    | 9.60    | 5.97    | 1.10    | 0.78   | 0.83    | 0.23  |
| Process           | Chemical industry                      | 0.00    | 0.00    | 0.00    | 0.00    | 0.00   | 436.19  | 0.00  |
| Process           | Non-metallic mineral products industry | 0.00    | 0.00    | 0.00    | 26.01   | 10.35  | 0.00    | 0.00  |
| Total             |                                        | 3205.03 | 2484.07 | 1603.67 | 1129.54 | 682.17 | 556.85  | 16.21 |
| Xinxiang ET Park  |                                        |         |         |         |         |        |         |       |
| Sector            | The secondary sector                   |         |         |         |         |        |         |       |
| Power plant       |                                        | 1218.63 | 1122.41 | 486.02  | 424.53  | 110.75 | 36.45   | 4.86  |
| Industry Boiler   | Circulating Fluidized bed furna        | 24.07   | 34.22   | 13.53   | 1.29    | 0.40   | 1.27    | 0.15  |
| Process           | Natural gas                            | 0.00    | 6.69    | 4.32    | 0.86    | 0.67   | 0.62    | 0.19  |
| Process           | Chemical industry                      |         |         |         |         |        | 51.20   |       |
| Process           | Non-metallic mineral products industry | 0.18    | 0.08    | 12.12   | 0.22    | 0.12   | 0.30    | 0.00  |
| Total             |                                        | 1242.88 | 1163.39 | 515.99  | 426.89  | 111.93 | 89.84   | 5.21  |
| Zhengzhou HA Park |                                        |         |         |         |         |        |         |       |
| Sector            | The secondary sector                   |         |         |         |         |        |         |       |
| Power plant       |                                        | 3038.42 | 8074.60 | 1891.52 | 289.05  | 140.16 | 148.39  | 29.64 |
| Industry Boiler   |                                        | 308.94  | 111.24  | 1154.90 | 4.55    | 1.20   | 14.13   | 1.62  |
| Process           | Chemical industry                      | 0.00    | 0.00    | 0.00    | 12.02   | 34.88  | 485.68  | 0.00  |
| Process           | Non-metallic mineral products industry | 223.30  | 18.61   | 1503.53 | 485.44  | 162.48 | 632.13  | 0.00  |
| Process           | Non-ferrous metals                     | 0.00    | 0.00    | 0.00    | 0.00    | 0.00   | 0.00    | 0.00  |
| Total             |                                        | 3570.66 | 8204.45 | 4549.96 | 791.06  | 338.73 | 1280.32 | 31.26 |
| Anyang HA Park    |                                        |         |         |         |         |        |         |       |
| Sector            | The secondary sector                   |         |         |         |         |        |         |       |
| Power plant       |                                        | 0.00    | 0.00    | 0.00    | 0.00    | 0.00   | 0.00    | 0.00  |
| Industry Boiler   | Stratum Burning Furnace                | 60.83   | 60.65   | 227.43  | 0.52    | 0.29   | 2.73    | 0.30  |
| Process           | Pulverized coal stove                  | 162.87  | 67.06   | 81.19   | 0.90    | 0.09   | 7.31    | 0.81  |
| Process           | Natural gas                            | 0.00    | 2.21    | 1.38    | 0.25    | 0.18   | 0.19    | 0.05  |
| Process           | Non-metallic mineral                   | 223.70  | 129.92  | 309.99  | 1.67    | 0.56   | 10.23   | 1.17  |
| Process           | Non-metallic mineral                   | 32.92   | 2.74    | 221.63  | 3.65    | 1.45   | 7.13    | 0.00  |

|                   |                                        |        |        |         |         |         |        |       |
|-------------------|----------------------------------------|--------|--------|---------|---------|---------|--------|-------|
|                   | products industry                      |        |        |         |         |         |        |       |
| Total             |                                        | 256.62 | 132.67 | 531.63  | 5.31    | 2.01    | 17.36  | 1.17  |
| Xinxiang HA Park  |                                        |        |        |         |         |         |        |       |
| Sector            | The secondary sector                   |        |        |         |         |         |        |       |
| Power plant       |                                        | 0.00   | 0.00   | 0.00    | 0.00    | 0.00    | 0.00   | 0.00  |
| Industry Boiler   | Natural gas                            | 0.00   | 13.97  | 8.69    | 1.60    | 1.14    | 1.20   | 0.33  |
| Process           | Chemical industry                      | 0.00   | 0.00   | 0.00    | 0.00    | 0.00    | 28.32  | 0.00  |
| Total             |                                        | 0.00   | 13.97  | 8.69    | 1.60    | 1.14    | 29.52  | 0.33  |
| Jiaozuo Park      |                                        |        |        |         |         |         |        |       |
| Sector            | The secondary sector                   |        |        |         |         |         |        |       |
| Power plant       | Circulating Fluidized bed furna        | 262.73 | 49.11  | 137.52  | 0.95    | 0.44    | 9.82   | 1.31  |
| Industry Boiler   | Natural gas                            | 1.18   | 6.19   | 3.85    | 0.71    | 0.50    | 0.53   | 0.15  |
| Process           | Chemical industry                      |        |        |         | 0.00    | 0.00    | 92.30  |       |
|                   | Non-metallic mineral products industry | 92.07  | 24.18  | 643.36  | 74.62   | 25.46   | 21.22  |       |
| Jiaozuo Park      |                                        |        |        |         |         |         |        |       |
| Total             |                                        | 355.98 | 79.48  | 784.73  | 76.29   | 26.40   | 123.87 | 91.46 |
| Zhengzhou AP Park |                                        |        |        |         |         |         |        |       |
| Sector            | The secondary sector                   |        |        |         |         |         |        |       |
| Power plant       |                                        | 0.00   | 0.00   | 0.00    | 0.00    | 0.00    | 0.00   | 0.00  |
| Industry Boiler   | Stratum Burning Furnace                | 6.31   | 25.14  | 56.04   | 10.09   | 8.56    | 10.18  | 2.16  |
|                   | Other gases                            | 1.53   | 0.74   | 0.31    | 0.55    | 0.03    | 0.03   | 0.00  |
|                   | Natural gas                            | 0.00   | 48.32  | 30.06   | 5.55    | 3.93    | 4.16   | 1.16  |
| Process           | Non-metallic mineral products industry | 221.67 | 18.47  | 1492.57 | 1230.40 | 442.70  | 48.03  | 0.00  |
|                   | Chemical industry                      | 0.00   | 0.00   | 0.00    | 2.33    | 2.05    | 0.00   | 2.45  |
| Total             |                                        | 229.50 | 92.67  | 1578.98 | 1248.92 | 457.27  | 62.40  | 5.77  |
| Huanglong Park    |                                        |        |        |         |         |         |        |       |
| Sector            | The secondary sector                   |        |        |         |         |         |        |       |
| Power plant       | Stratum Burning Furnace                | 7.00   | 125.00 | 1283.00 | 4.00    | 2.00    | 0.00   | 14.00 |
| Industry Boiler   | Circulating Fluidized bed furna        | 243.00 | 373.00 | 4866.00 | 7829.00 | 1405.00 | 11.00  | 49.00 |

|                            |                      |          |          |           |          |         |          |         |
|----------------------------|----------------------|----------|----------|-----------|----------|---------|----------|---------|
|                            | Chemical industry    | 193.00   | 294.00   | 1912.00   | 206.00   | 151.00  | 2471.00  | 1187.00 |
| Total                      |                      | 443.00   | 792.00   | 8061.00   | 8039.00  | 1558.00 | 2482.00  | 1250.00 |
| Anyang Steel Park          |                      |          |          |           |          |         |          |         |
| Sector                     | The secondary sector |          |          |           |          |         |          |         |
| Power plant                |                      | 0.00     | 0.00     | 0.00      | 0.00     | 0.00    | 0.00     | 0.00    |
| Industry Boiler            |                      | 925.00   | 1138.00  | 5844.00   | 135.00   | 135.00  | 205.00   | 0.00    |
|                            | Black metal          | 16369.00 | 11635.00 | 299833.00 | 3003.00  | 1984.00 | 10085.00 | 0.00    |
| Anyang Steel Park          |                      |          |          |           |          |         |          |         |
| Total                      |                      | 17294.00 | 12773.00 | 305677.00 | 3138.00  | 2119.00 | 10290.00 | 0.00    |
| Total of all industry park |                      | 42850.74 | 39279.57 | 351452.12 | 19202.25 | 7077.23 | 18078.44 | 2444.34 |

**Table S11.** Emission inventory of CO<sub>2</sub> (10<sup>4</sup> t).

| Industry Park     | Power Plant | Terminal Energy use |
|-------------------|-------------|---------------------|
| Puyang Park       | 229         | 435                 |
| Zhengzhou ET Park | 0           | 98                  |
| Kaifeng ET Park   | 0           | 27                  |
| Hongqiqu Park     | 252         | 291                 |
| Hebi Park         | 152         | 3                   |
| Xinxiang ET Park  | 53          | 37                  |
| Zhengzhou HA Park | 201         | 80                  |
| Anyang HA Park    | 0           | 18                  |
| Xinxiang HA Park  | 0           | 18                  |
| Jiaozuo Park      | 20          | 3                   |
| Zhengzhou AP Park | 0           | 14                  |
| Huanglong Park    | 0           | 493                 |
| Anyang Steel Park | 0           | 1132                |
| Total             | 908         | 2647                |

51. Gao, G.; Wang, S.; Xue, R.; Liu, D.; Ren, H.; Zhang, R. Uncovering the characteristics of air pollutants emission in industrial parks and analyzing emission reduction potential: case studies in Henan, China. *Sci Rep* **2021**, *11* (1), 23709. <https://doi.org/10.1038/s41598-021-03193-z>.
52. Ministry of Ecology and Environment of the People's Republic of China (MEE). Emission Source statistics survey Production and emission accounting method and coefficient Manual. Available online: [https://www.mee.gov.cn/xxgk/2018/xxgk/xxgk01/202106/t20210618\\_839512.html](https://www.mee.gov.cn/xxgk/2018/xxgk/xxgk01/202106/t20210618_839512.html) (accessed on 19 December 2021).
53. Pham, T. B. T.; Manomaiphiboon, K.; Vongmahadlek, C. Development of an inventory and temporal allocation profiles of emissions from power plants and industrial facilities in Thailand. *Sci. Total. Environ.* **2008**, *397* (1–3), 103–118. <https://doi.org/10.1016/j.scitotenv.2008.01.066>.
54. He, M.; Wang, X.R.; Han, L. Inventory and characteristics of atmospheric fixed pollution source emissions in Sichuan Province. *Acta. Sci. Circumst.* **2013**, *33*, 3127–3137, doi: 10.13671/j.hjkxxb.2013.11.033 (In Chinese).
55. Huang, C.; Chen, C.H.; Li, L.; Cheng, Z.; Wang, H.L.; Wang, Y.J.; Huang, H.Y.; Zhang, G.F.; Chen, Y.R. Study on the characteristics of anthropogenic air pollutants emission in the Yangtze River Delta. *Acta. Sci. Circumst.* **2011**, (09), 1858–1871, doi: 10.13671/j.hjkxxb.2011.09.013. (In Chinese).
56. United States Environmental Protection Agency (U.S.EPA). AP-42: Compilation of Air Emission Factors. Available online: <https://www.epa.gov/air-emissions-factors-and-quantification/ap-42-compilation-air-emission-factors> (accessed on 19 December 2021).
57. Ministry of Ecology and Environment of the People's Republic of China (MEE). Technical Guidelines for Compilation of Air Pollutant Source Emission Inventory. Available online: [http://www.mee.gov.cn/ywgz/fgbz/bz/bzwb/wrfzjszc/201812/t20181225\\_685872.shtml](http://www.mee.gov.cn/ywgz/fgbz/bz/bzwb/wrfzjszc/201812/t20181225_685872.shtml) (accessed on 19 December 2021).
58. Yin, S.; Zheng, J.; Zhang, L.; Zhong, L.; Anthropogenic ammonia emission inventory and characteristics in the Pearl River Delta Region. *Environ. Sci.* **2010**, *31* (5), 1146–1151, doi: 10.13227/j.hjkx.2010.05.037. (In Chinese).
59. Zhou, Y.; Wu, Y.; Yang, L.; Fu, L. X.; He, K. B.; Wang, S. X.; Hao, J. M.; Chen, J. C.; Li, C. Y. The impact of transportation control measures on emission reductions during the 2008 Olympic Games in Beijing, China. *Atmos. Environ.* **2010**, *44* (3), 285–293. <https://doi.org/10.1016/j.atmosenv.2009.10.040>.

60. Lei, Y.; Zhang, Q. A.; Nielsen, C.; He, K. B. An inventory of primary air pollutants and CO<sub>2</sub> emissions from cement production in China, 1990–2020. *Atmos. Environ.* **2011**, *45* (1), 147–154. <https://doi.org/10.1016/j.atmosenv.2010.09.034>.
61. Bo, Y.; Cai, H.; Xie, S. D. Spatial and temporal variation of historical anthropogenic NMVOCs emission inventories in China. *Atmos. Chem. Phys.* **2008**, *8* (23), 7297–7316. <https://doi.org/10.5194/acp-8-7297-2008>.
62. Lei, Y.; He, K.; Zhang, Q.; Liu, Z. Technology-based emission inventory of particulate matters (PM) from cement industry. *Environ. Sci.* **2008**, *29* (8), 2366–2371. doi: 10.13227/j.hjkx.2008.08.029. (In Chinese).
63. Zhao B.; Ma J.Z.; Development of an air pollutant emission inventory for Tianjin. *Acta. Sci. Circumst.* **2008**, *28*(2):368–375, doi: 10.13671/j.hjkxxb.2008.02.019. (In Chinese).
64. Zhao, Y.; Nielsen, C. P.; McElroy, M. B.; Zhang, L.; Zhang, J. CO emissions in China: Uncertainties and implications of improved energy efficiency and emission control. *Atmos. Environ.* **2012**, *49*, 103–113. doi: 10.1016/j.atmosenv.2011.12.015.
65. Ministry of Ecology and Environment of the People's Republic of China (MEE). Technical Guidelines for Compiling the Primary Source Emission Inventory of Inhalable Particulate Matter. Available online: [http://www.mee.gov.cn/gkml/hbb/bgg/201408/t20140828\\_288364.htm](http://www.mee.gov.cn/gkml/hbb/bgg/201408/t20140828_288364.htm). (accessed on 19 December 2021).
66. National Development and Reform Commission. (NDRC). Provincial Greenhouse Gas Inventory. Available online: <http://cn.edcmee.org.cn/ptfb/zcbz/202106/P020210601177040314696.pdf> (accessed on 19 December 2021).
67. National Development and Reform Commission (NDRC). National Key Energy-saving and Low-carbon Technology Promotion Catalogue (2017). Available online: [http://www.gov.cn/xinwen/2017-04/01/content\\_5182743.htm](http://www.gov.cn/xinwen/2017-04/01/content_5182743.htm) (accessed on 25 November 2021).
68. Xu, Y.; Hu, J. L.; Ying, Q.; Hao, H. K.; Wang, D. X.; Zhang, H. L. Current and future emissions of primary pollutants from coal-fired power plants in Shaanxi, China. *Sci. Total. Environ.* **2017**, *595*, 505–514. <https://doi.org/10.1016/j.scitotenv.2017.03.267>.
69. Ministry of Ecology and Environment of the people's Republic of China (MEC). Guideline on available techniques of pollution prevention and control for industrial boiler. Available online: [http://www.mee.gov.cn/xxgk/xxgk/xxgk06/201909/t20190911\\_733464.html](http://www.mee.gov.cn/xxgk/xxgk/xxgk06/201909/t20190911_733464.html) (accessed on 19 December 2021).
70. Chinese Academy of Environmental Planning (CAEP) China Carbon Dioxide Capture Utilization and Storage (CCUS) Annual Report (2021). Available online: [http://www.caep.org.cn/sy/dqhj/gh/202107/t20210725\\_851241.shtml](http://www.caep.org.cn/sy/dqhj/gh/202107/t20210725_851241.shtml) (accessed on 19 December 2021).
71. Zhang, Y. S.; Li, C.; Yan, Q. S.; Han, S. J.; Zhao, Q. Y.; Yang, L. M.; Liu, Y. G.; Zhang, R. Q. Typical industrial sector-based volatile organic compounds source profiles and ozone formation potentials in Zhengzhou, China. *Atmos. Pollut. Res.* **2020**, *11* (5), 841–850. <https://doi.org/10.1016/j.apr.2020.01.012>.
